# Supplementary material for: Direct covalent grafting of an organic radical core on gold and silver
Source: Royal Society of Chemistry journal article supplement (doi:10.1039/c7ra01686g), 2017-01-01
Supplement: c7ra01686g1.pdf [file c7ra01686g1.pdf]

## Supporting Information

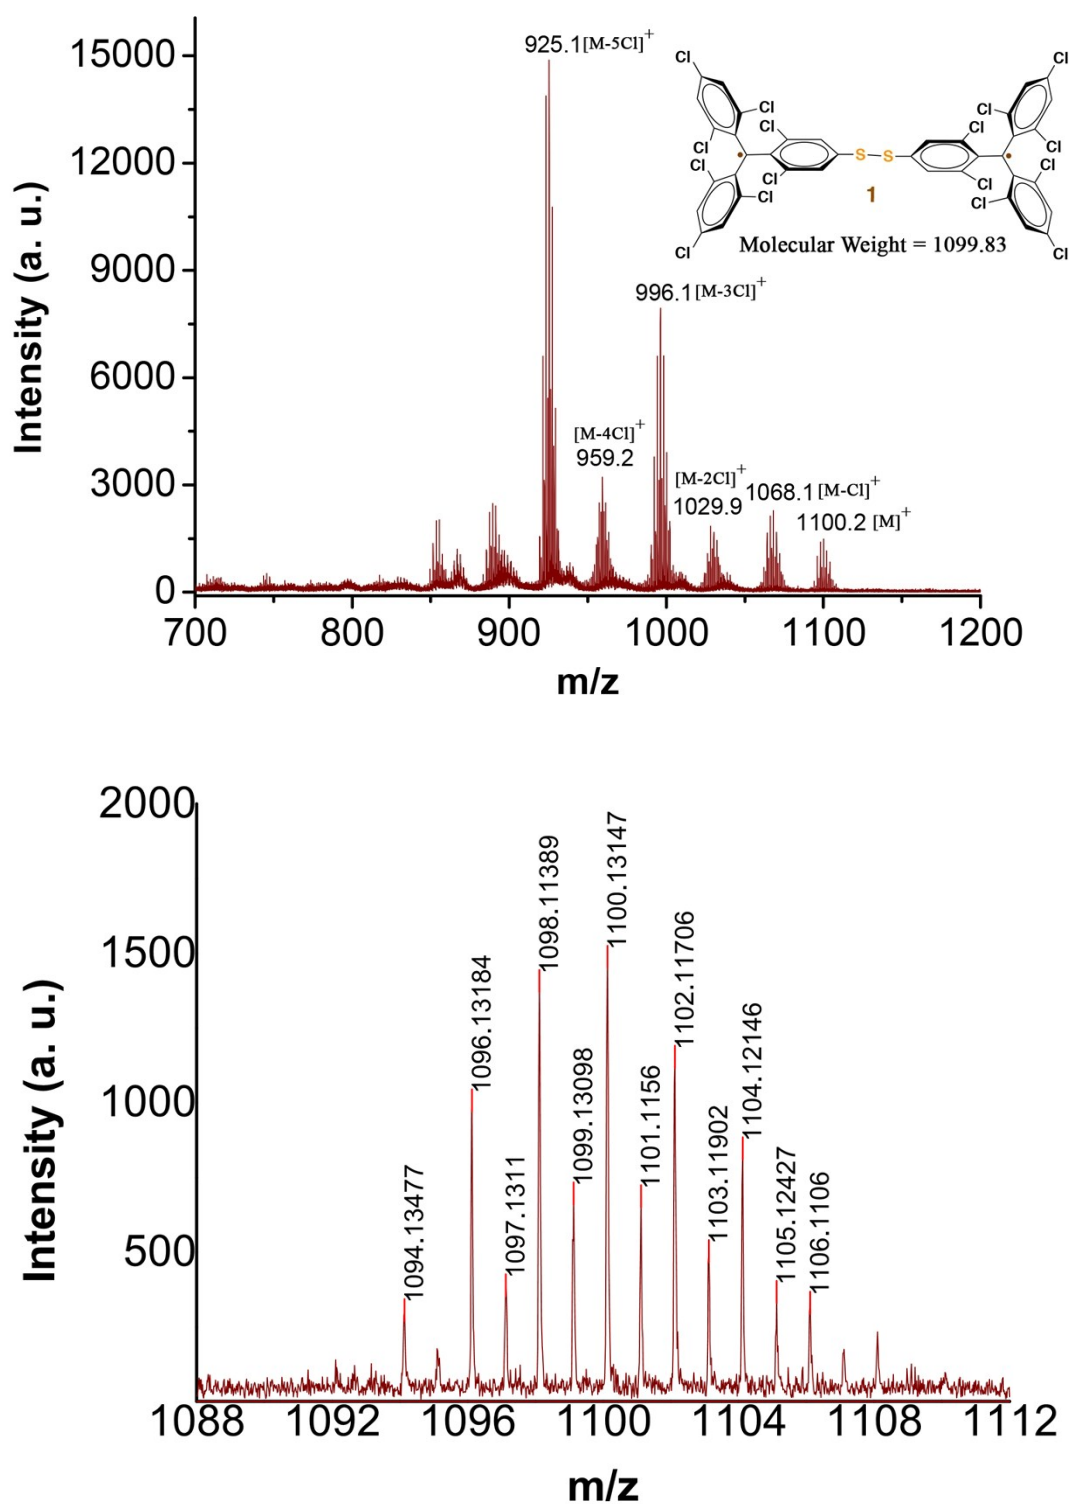

**Figure S1:** MALDI-TOF of **1** diradical under positive mode. The enlarged plot at  $m/z$  = 1100 also showed.

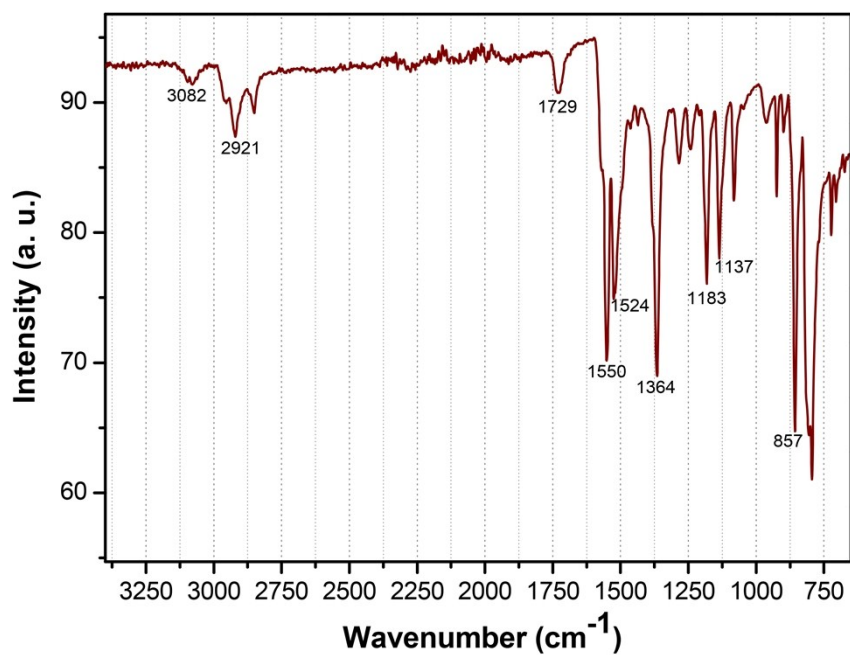

**Figure S2:** IR (ATR) of **1**.

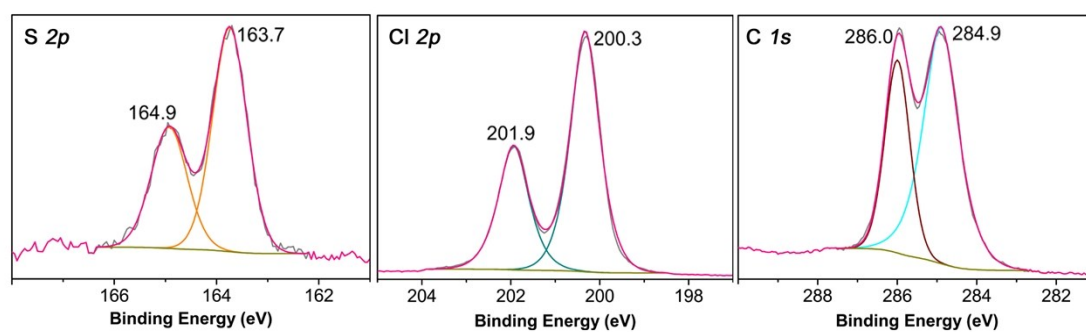

**Figure S3:** XPS of **1** drop-casted on Au.

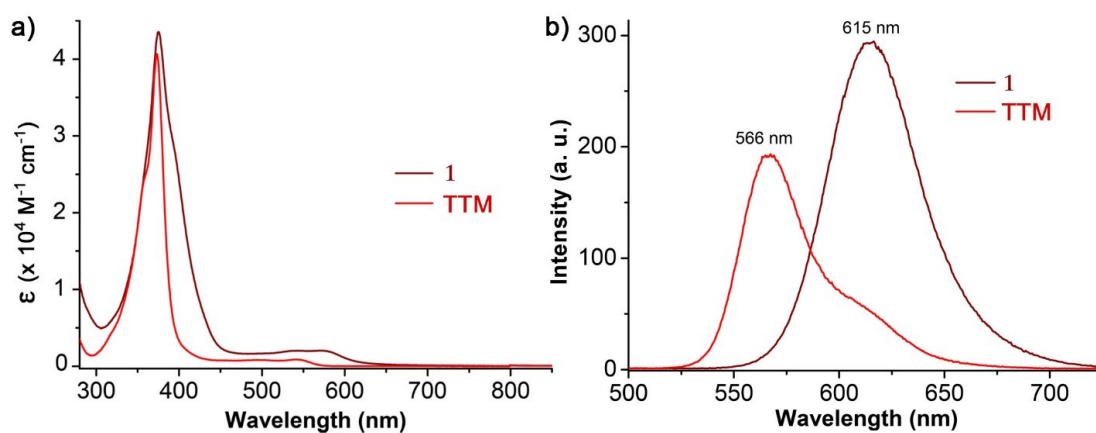

**Figure S4:** a) UV-vis and b) fluorescence spectra of **1** and TTM in  $\text{CH}_2\text{Cl}_2$ . Solutions of  $1.3 \times 10^{-5}$  M and  $1 \times 10^{-6}$  M were used for UV-vis and fluorescence spectroscopy, respectively ( $\lambda_{\text{ex}} = 375$  nm).

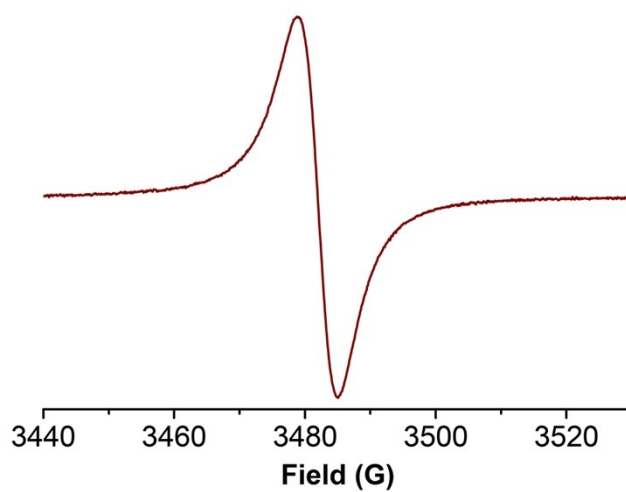

**Figure S5:** EPR of **1** (solid) at 300 K.

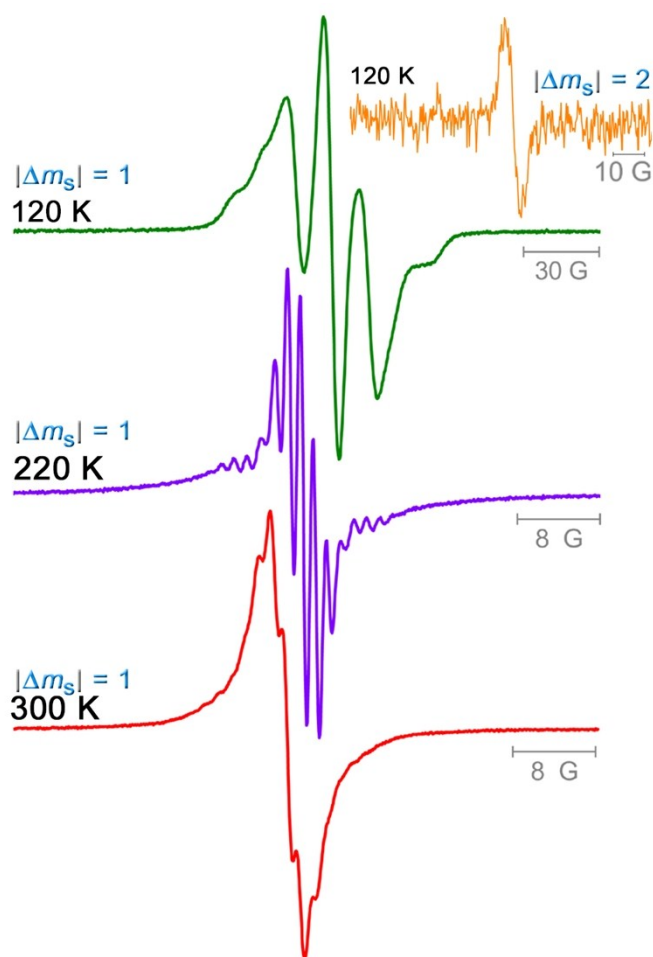

**Figure S6:** The temperature-dependent EPR of **1** ( $5 \times 10^{-4}$  M) in  $\text{CH}_2\text{Cl}_2$ /toluene (1:1 v/v).

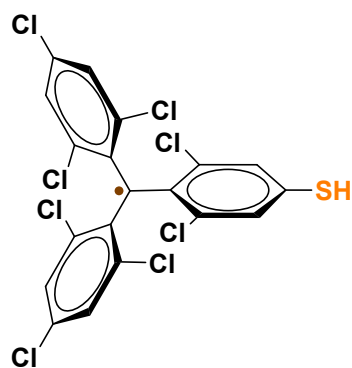

**Figure S7:** Monoradical by-product that is formed during the synthesis if **1**.

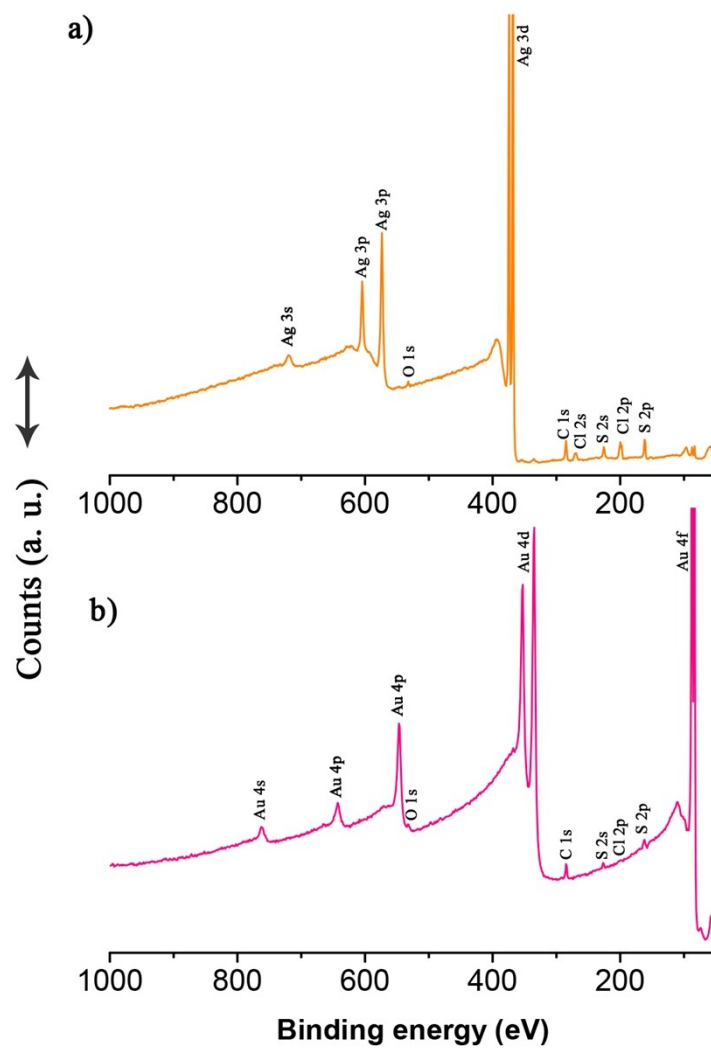

**Figure S8:** XPS general survey of a) **1**/Ag and b) **1**/Au.

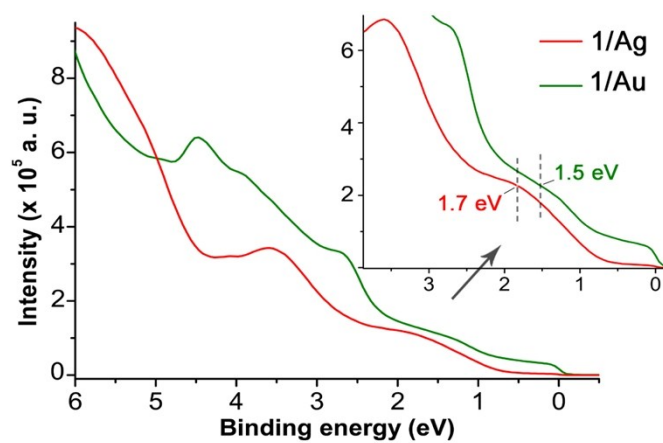

**Figure S9:** UPS of 1/Ag and 1/Au.

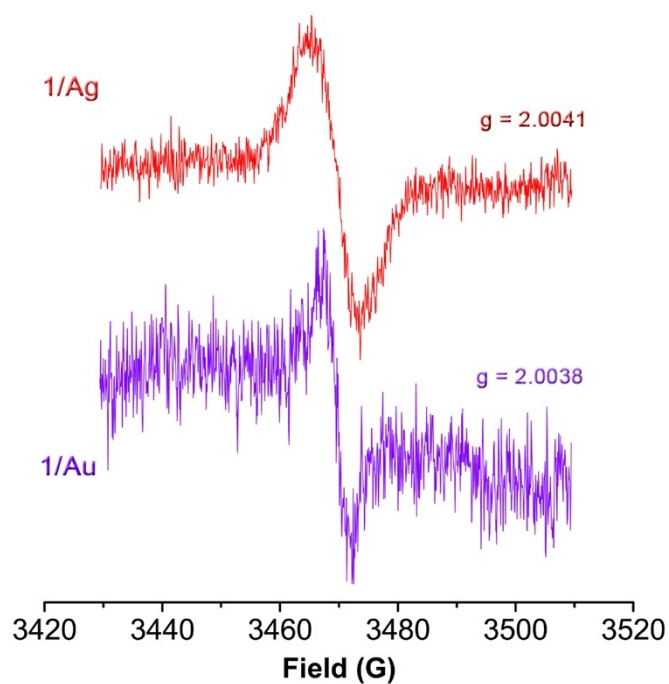

**Figure S10:** ESR of 1/Ag and 1/Au under ambient conditions.
